# Supplementary material for: Is oxidation–reduction a real robust strategy for lignin conversion? A comparative study on lignin and model compounds
Source: Royal Society of Chemistry journal article supplement (doi:10.1039/c8gc02670j), 2018-12-20
Supplement: c8gc02670j1.pdf [file c8gc02670j1.pdf]

## Supporting information

### Is oxidation-reduction a real robust strategy for lignin conversion? A comparative study on lignin and model compounds

Haiwei Guo,<sup>a,b</sup> Daniel M. Miles-Barrett,<sup>c</sup> Bo Zhang,<sup>a</sup> Aiqin Wang,<sup>a</sup> Tao Zhang,<sup>a</sup> Nicholas J. Westwood<sup>c\*</sup> and Changzhi Li<sup>a,d\*</sup>

|                                      |    |
|--------------------------------------|----|
| 1. Supporting Figures & Tables ..... | 1  |
| 2. References .....                  | 11 |

#### 1. Supporting Figures & Tables

**Chart S1.** Bar chart of depolymerization results and GC-FID spectrum of lignin oil for various lignins and the corresponding forms of lignin<sup>α-ox</sup> over W<sub>2</sub>C/AC.

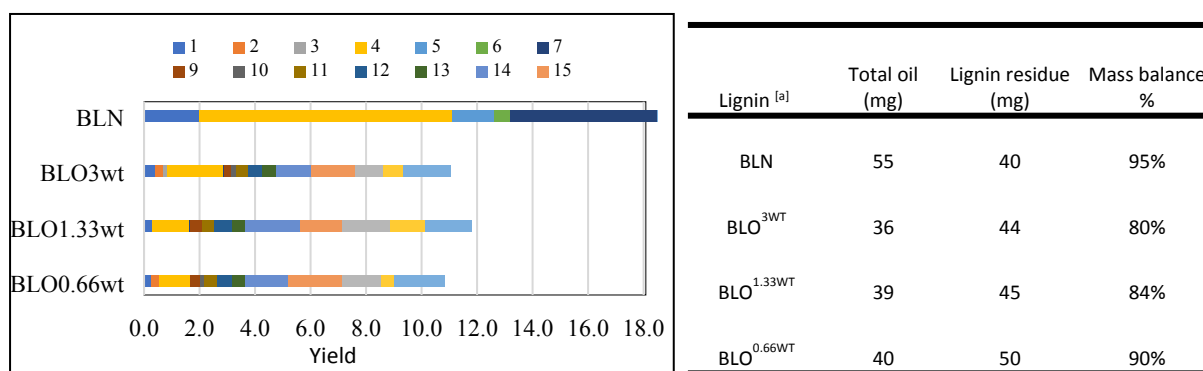

<sup>[a]</sup> To clarify, Beech lignin (BL), Beech lignin oxidation with 0.66 wt eqv. DDQ (BLO<sup>0.66WT</sup>), Beech lignin oxidation with 1.33 wt eqv. DDQ (BLO<sup>1.33WT</sup>), Beech lignin oxidation with 3 wt eqv. DDQ (BLO<sup>3WT</sup>). Reaction conditions: substrate: 100 mg, 30% W<sub>2</sub>C/AC: 100 mg, methanol: 30 ml, 200 °C, 6 h, 1 MPa H<sub>2</sub> (R.T.)

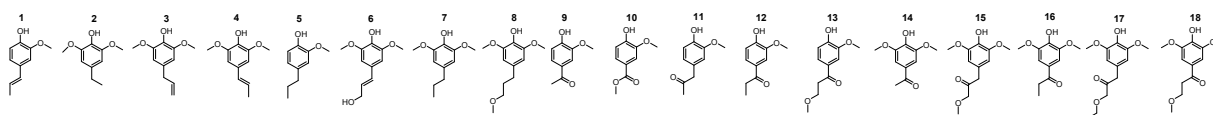

As for the mass balance, it's quite difficult to separate the lignin residue from the catalyst (as our catalysts were activated carbon (AC) supported catalysts and the lignin residue would get stuck in the porous AC), but we tried our best to calculate the lignin residue through the following method:

we first separated the catalysts (with lignin residue stuck inside) and reaction mixture through filtration after reaction. After drying the catalysts (with lignin residue), we calculated the weight of lignin residue through subtracting the catalysts we added. The amount of lignin oil was calculated through vacuuming down the reaction mixture. As shown in Chart S1, the mass balance was not great for all the lignins because of the operation error or some unforeseen issue existed during the operation process.

GC-FID Spectrum of lignin oil after reaction

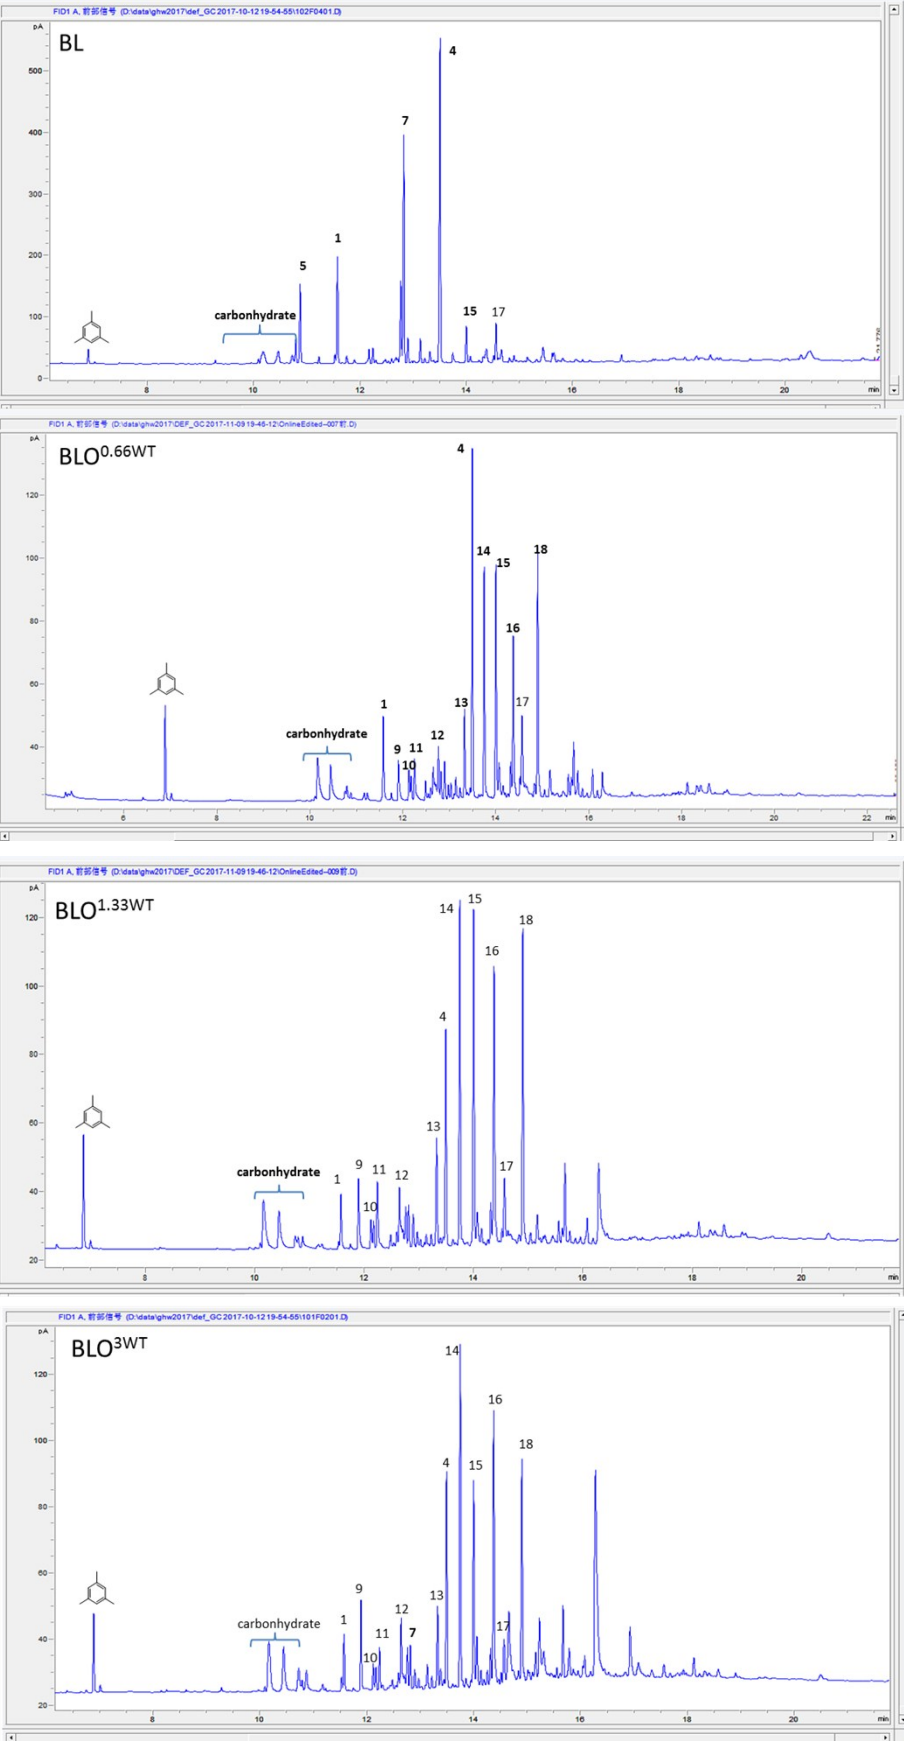

**Table S1.** Catalytic hydrogenolysis of various lignins and the corresponding forms of lignin<sup>α-ox</sup> over W<sub>2</sub>C/AC.

| Numbered products                   | Lignin <sup>OX</sup> |                    |                    | Lignin |      |      |
|-------------------------------------|----------------------|--------------------|--------------------|--------|------|------|
|                                     | BLO <sup>3WT</sup>   | PLO <sup>3WT</sup> | BiL <sup>3WT</sup> | BL     | PL   | BiL  |
| 1                                   | 0.3                  | 1.3                | 0.0                | 2.0    | 4.8  | 0.5  |
| 2                                   | 0.0                  | 0.0                | 0.0                | 0.0    | 0.0  | 0.0  |
| 3                                   | 0.0                  | 0.0                | 0.0                | 0.0    | 0.2  | 0.2  |
| 4                                   | 1.4                  | 0.2                | 0.3                | 9.1    | 2.0  | 3.2  |
| 5                                   | 0.0                  | 0.0                | 0.0                | 1.5    | 0.8  | 0.2  |
| 6                                   | 0.0                  | 0.0                | 0.0                | 0.6    | 0.0  | 0.0  |
| 7                                   | 0.0                  | 0.1                | 0.0                | 5.3    | 0.6  | 0.3  |
| 8                                   | 0.0                  | 0.0                | 0.0                | 0.0    | 0.0  | 0.0  |
| Total aryl-aromatics                | 1.7                  | 1.6                | 0.3                | 18.5   | 8.4  | 4.4  |
| 9                                   | 0.5                  | 1.1                | 0.1                | 0.0    | 0.3  | 0.0  |
| 10                                  | 0.0                  | 0.3                | 0.1                | 0.0    | 0.0  | 0.0  |
| 11                                  | 0.4                  | 0.8                | 0.4                | 0.0    | 0.4  | 0.3  |
| 12                                  | 0.7                  | 0.7                | 0.5                | 0.0    | 0.3  | 0.0  |
| 13                                  | 0.5                  | 0.4                | 0.3                | 0.0    | 0.0  | 0.0  |
| 14                                  | 2.0                  | 1.0                | 1.0                | 0.0    | 0.2  | 0.0  |
| 15                                  | 1.5                  | 1.0                | 1.4                | 0.0    | 0.2  | 0.7  |
| 16                                  | 1.7                  | 0.9                | 0.8                | 0.0    | 0.0  | 0.2  |
| 17                                  | 1.2                  | 0.1                | 0.2                | 0.0    | 0.2  | 1.1  |
| 18                                  | 1.7                  | 0.4                | 0.5                | 0.0    | 0.0  | 0.5  |
| 19                                  | 0.0                  | 0.0                | 0.0                | 0.0    | 0.4  | 0.2  |
| 20                                  | 0.0                  | 0.2                | 0.2                | 0.0    | 0.0  | 0.0  |
| 21                                  | 0.0                  | 0.3                | 0.2                | 0.0    | 0.0  | 0.0  |
| 22                                  | 0.0                  | 0.0                | 0.0                | 0.0    | 0.0  | 0.2  |
| Total carbonyl-containing aromatics | 10.2                 | 7.2                | 5.7                | 0.0    | 2.0  | 3.2  |
| YTM                                 | 11.8                 | 8.7                | 5.8                | 18.5   | 10.2 | 7.4  |
| YTO                                 | 35.6                 | 44.1               | 47.5               | 39.5   | 66.2 | 51.7 |

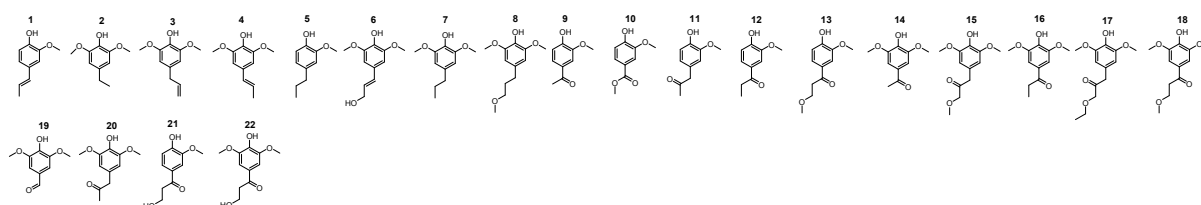

Reaction conditions: substrate: 100 mg, 30% W<sub>2</sub>C/AC: 100 mg, methanol: 30 mL, 200 °C, 6 h, 1 MPa H<sub>2</sub> (R.T.)

# GC-FID Spectrum of lignin oil after reaction

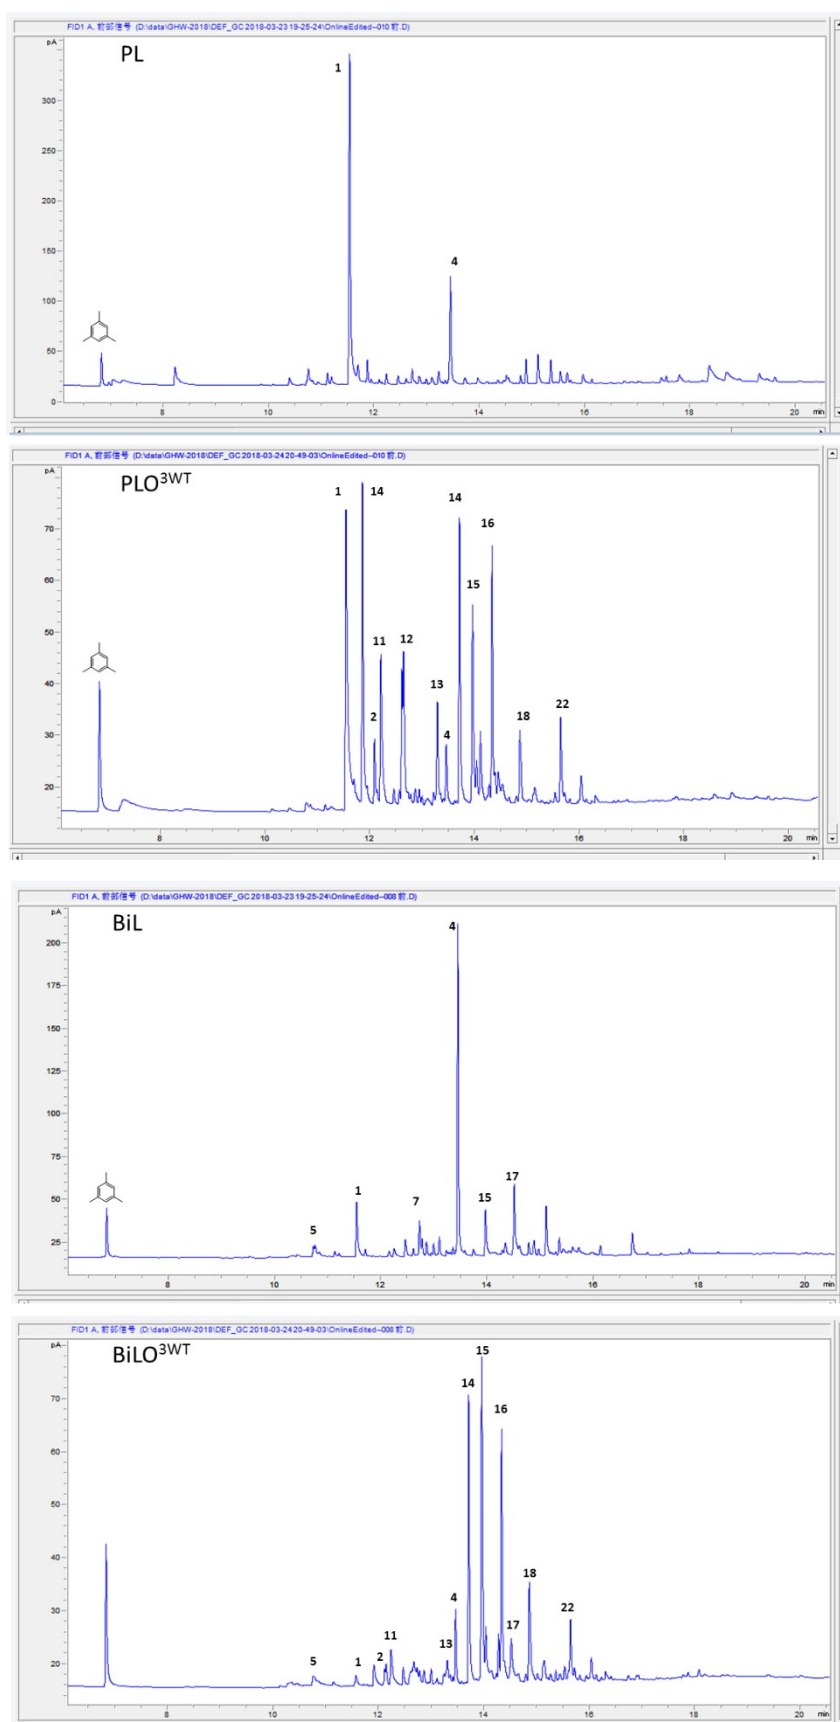

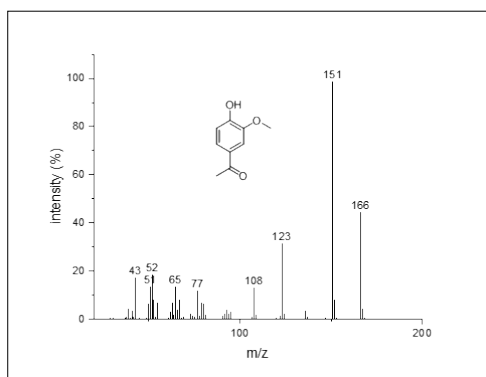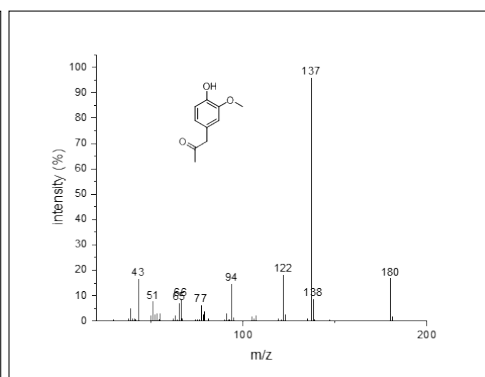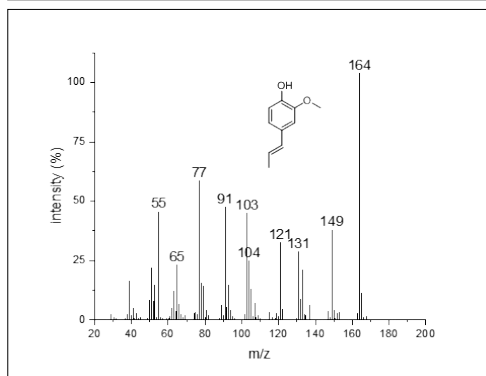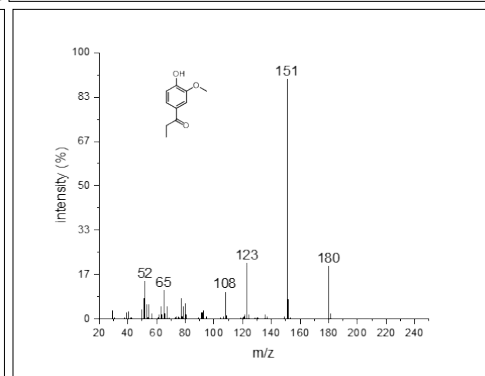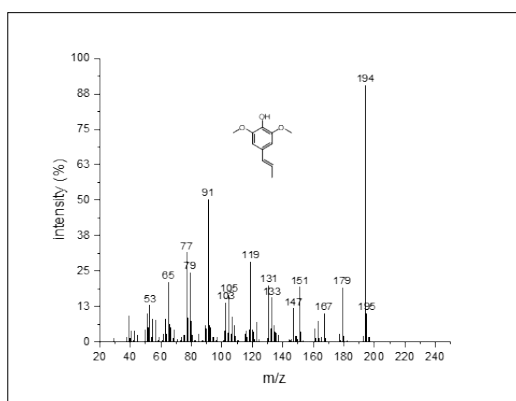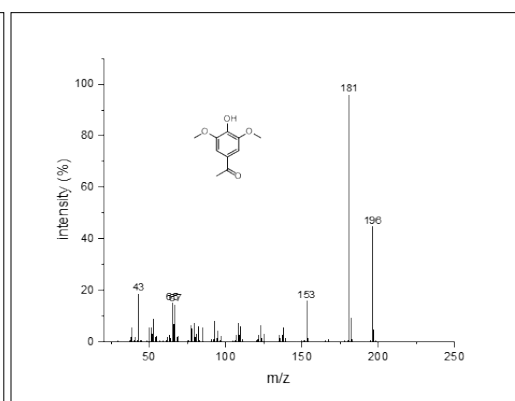

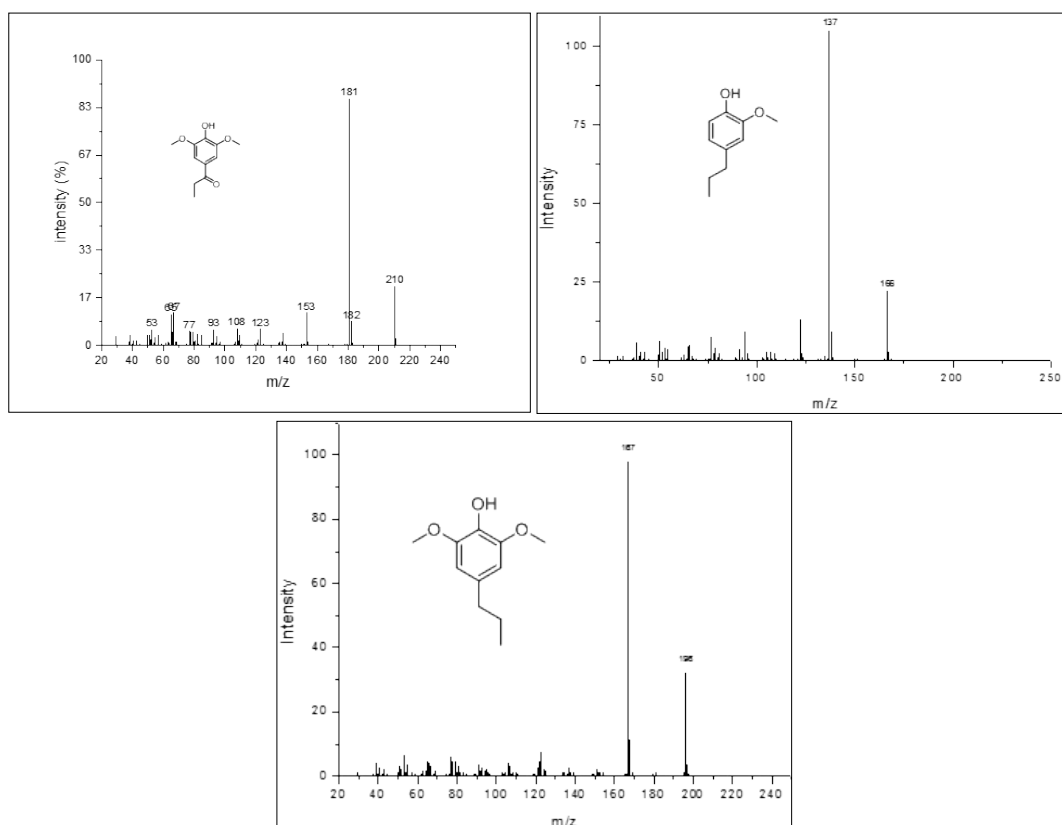

**Figure S1.** Identification of monomers from lignin and lignin $^{\alpha}$ -OX.

**Table S2.** Further study of BLO<sup>3WT</sup> and BL under mild conditions over W<sub>2</sub>C/AC.

| Numbered                            | BL <sup>3WT</sup> |         |        |        | BL     |         |        |        |
|-------------------------------------|-------------------|---------|--------|--------|--------|---------|--------|--------|
| Products                            | 100 6h            | 100 24h | 150 6h | 200 6h | 100 6h | 100 24h | 150 6h | 200 6h |
| 1                                   | 0.0               | 0.0     | 0.0    | 0.3    | 0.2    | 0.5     | 0.7    | 2.0    |
| 2                                   | 0.0               | 0.0     | 0.0    | 0.0    | 0.0    | 0.0     | 0.0    | 0.0    |
| 3                                   | 0.0               | 0.0     | 0.0    | 0.0    | 0.0    | 0.0     | 0.0    | 0.0    |
| 4                                   | 0.0               | 0.2     | 0.4    | 1.4    | 1.3    | 3.7     | 3.8    | 9.1    |
| 5                                   | 0.0               | 0.0     | 0.0    | 0.0    | 0.1    | 0.3     | 0.3    | 1.5    |
| 6                                   | 0.0               | 0.0     | 0.0    | 0.0    | 0.4    | 0.0     | 0.3    | 0.6    |
| 7                                   | 0.3               | 0.0     | 0.0    | 0.0    | 0.2    | 0.9     | 1.2    | 5.3    |
| 8                                   | 0.0               | 0.0     | 0.0    | 0.0    | 0.0    | 0.0     | 0.0    | 0.0    |
| Total aryl-aromatics                | 0.3               | 0.2     | 0.4    | 1.7    | 2.2    | 5.4     | 6.3    | 18.5   |
| 9                                   | 0.0               | 0.0     | 0.0    | 0.5    | 0.1    | 0.0     | 0.0    | 0.0    |
| 10                                  | 0.0               | 0.0     | 0.0    | 0.0    | 0.0    | 0.0     | 0.0    | 0.0    |
| 11                                  | 0.0               | 0.0     | 0.0    | 0.4    | 0.0    | 0.0     | 0.0    | 0.0    |
| 12                                  | 0.0               | 0.4     | 0.4    | 0.7    | 0.0    | 0.0     | 0.0    | 0.0    |
| 13                                  | 0.0               | 0.0     | 0.3    | 0.5    | 0.0    | 0.0     | 0.0    | 0.0    |
| 14                                  | 0.0               | 0.0     | 0.2    | 2.0    | 0.0    | 0.0     | 0.0    | 0.0    |
| 15                                  | 0.0               | 0.0     | 0.0    | 1.5    | 0.0    | 0.0     | 0.0    | 0.0    |
| 16                                  | 0.2               | 0.3     | 0.5    | 1.7    | 0.2    | 0.2     | 0.3    | 0.0    |
| 17                                  | 0.5               | 0.2     | 0.0    | 1.2    | 0.0    | 0.3     | 0.7    | 0.0    |
| 18                                  | 0.0               | 0.2     | 0.0    | 1.7    | 0.0    | 0.0     | 0.0    | 0.0    |
| 19                                  | 0.0               | 0.0     | 0.0    | 0.0    | 0.0    | 0.2     | 0.2    | 0.0    |
| 20                                  | 0.3               | 0.3     | 0.3    | 0.0    | 0.2    | 0.1     | 0.4    | 0.0    |
| 21                                  | 0.0               | 0.0     | 0.0    | 0.0    | 0.0    | 0.0     | 0.0    | 0.0    |
| 22                                  | 0.0               | 0.0     | 0.0    | 0.0    | 0.0    | 0.0     | 0.0    | 0.0    |
| Total carbonyl-containing aromatics | 1.0               | 1.4     | 1.7    | 10.2   | 0.5    | 0.8     | 1.6    | 0.0    |
| YTM                                 | 1.4               | 1.5     | 2.1    | 11.8   | 2.6    | 6.1     | 8.0    | 18.5   |
| YTO                                 | 38.5              | 38.4    | 37.5   | 35.6   | 27.8   | 42.5    | 45.9   | 39.5   |

[a] 100 mg 30% W<sub>2</sub>C/AC was used under 200 6 h condition

Reaction conditions: substrate: 100 mg, 30% W<sub>2</sub>C/AC: 100 mg, methanol: 30 mL, 100/150/200 °C, 6/24 h, 1 MPa H<sub>2</sub> (R.T.)

# GC-FID Spectrum of lignin oil after reaction

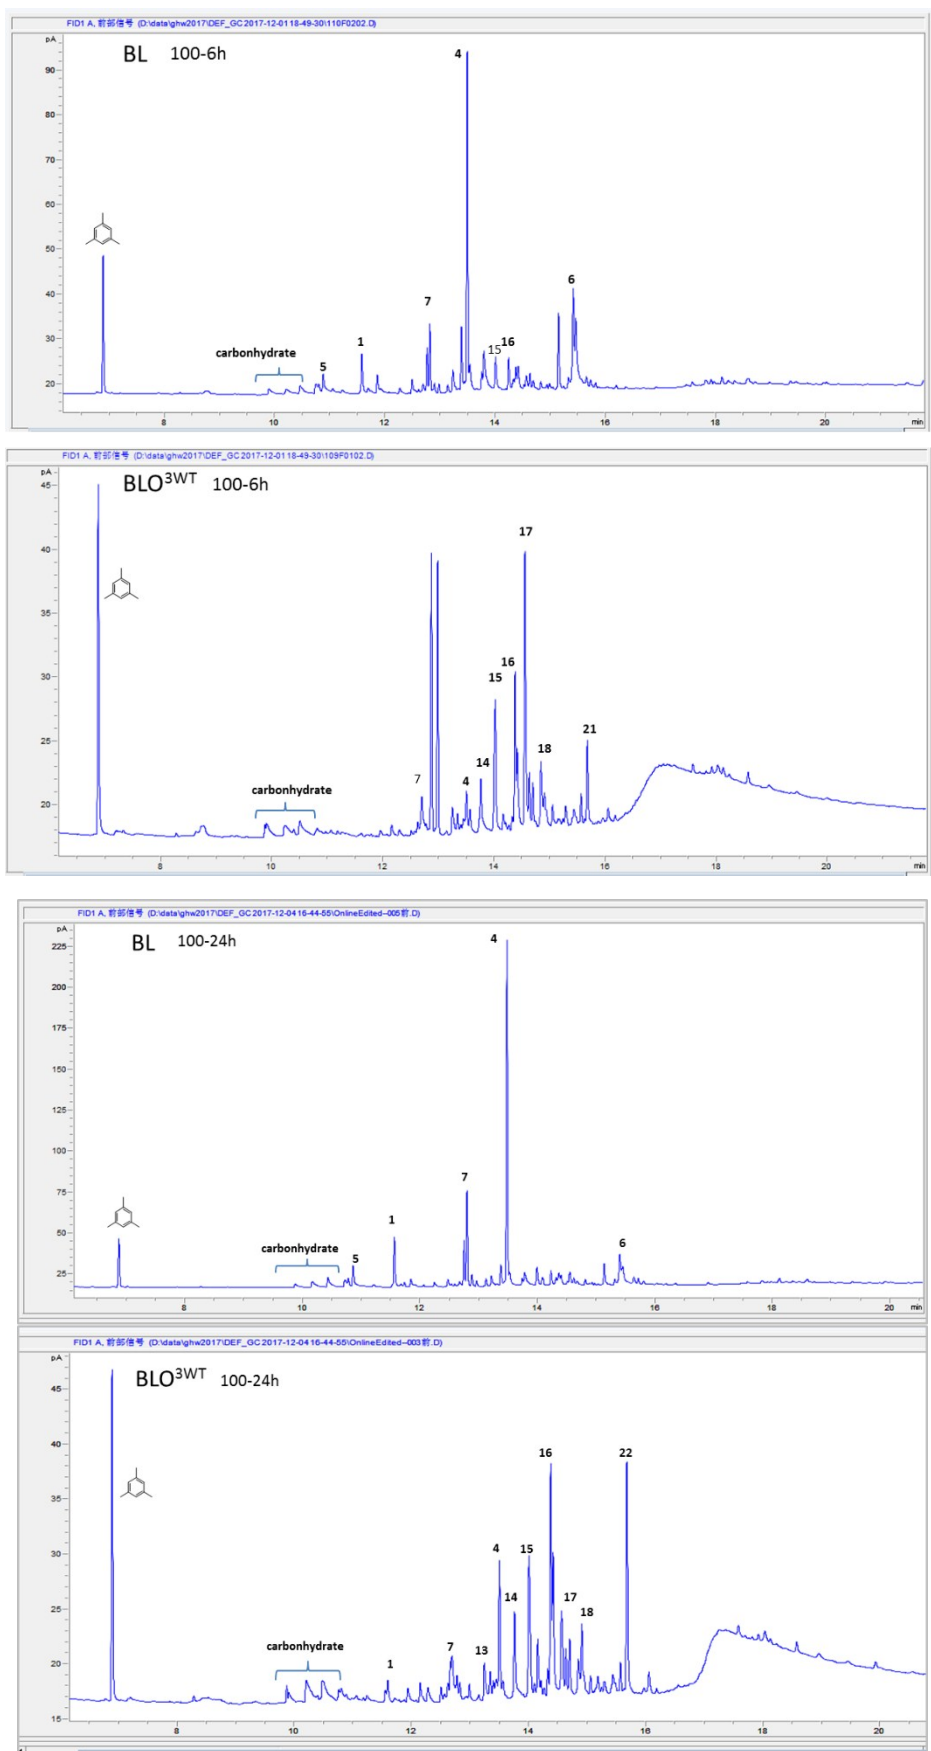

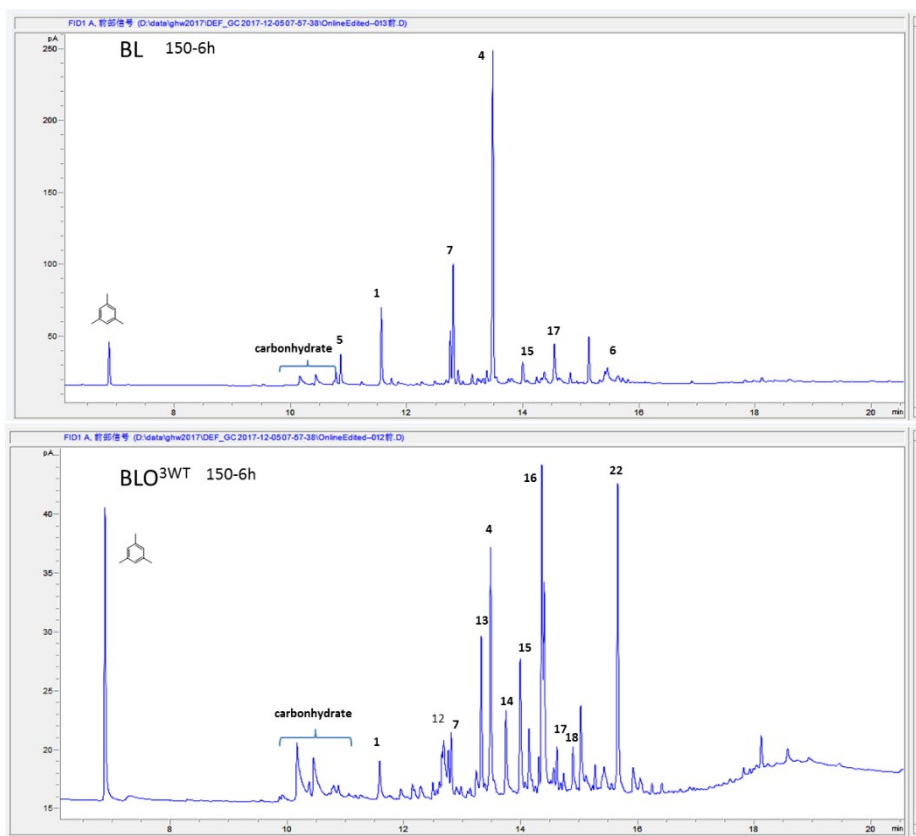



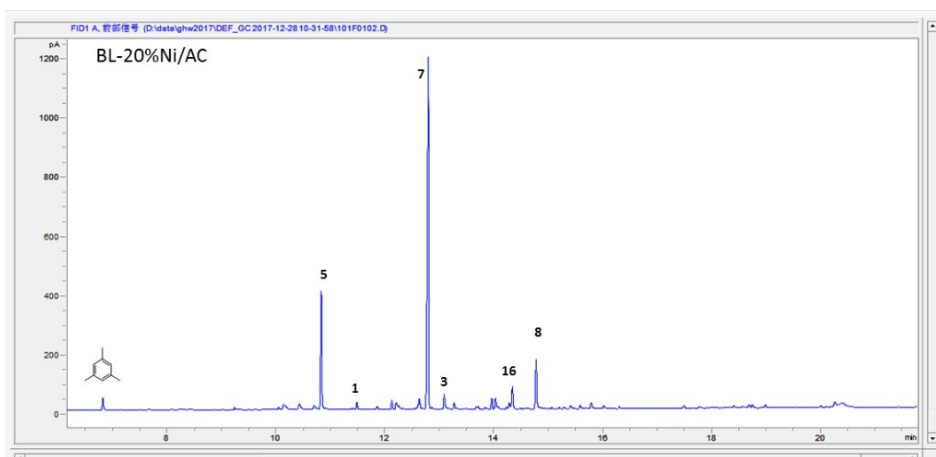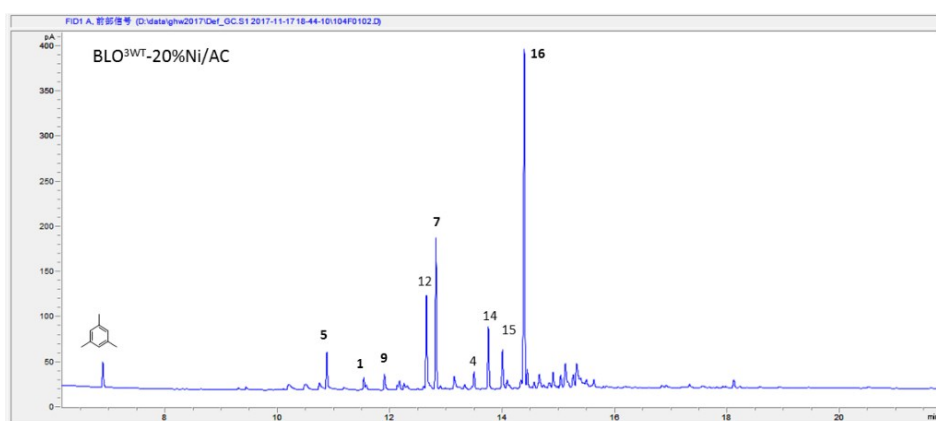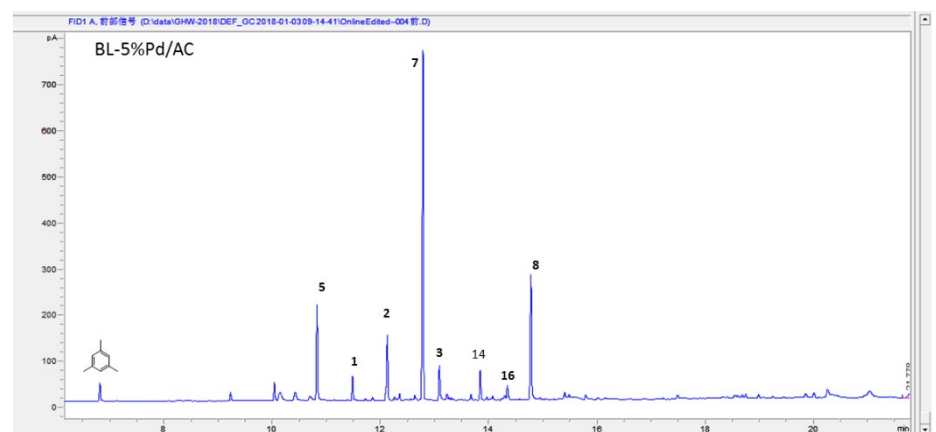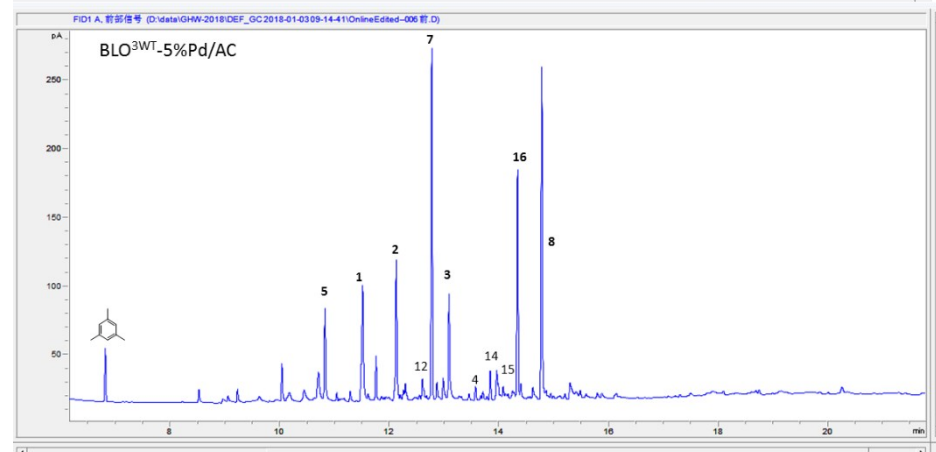

GC-FID Spectrum of lignin oil after reaction

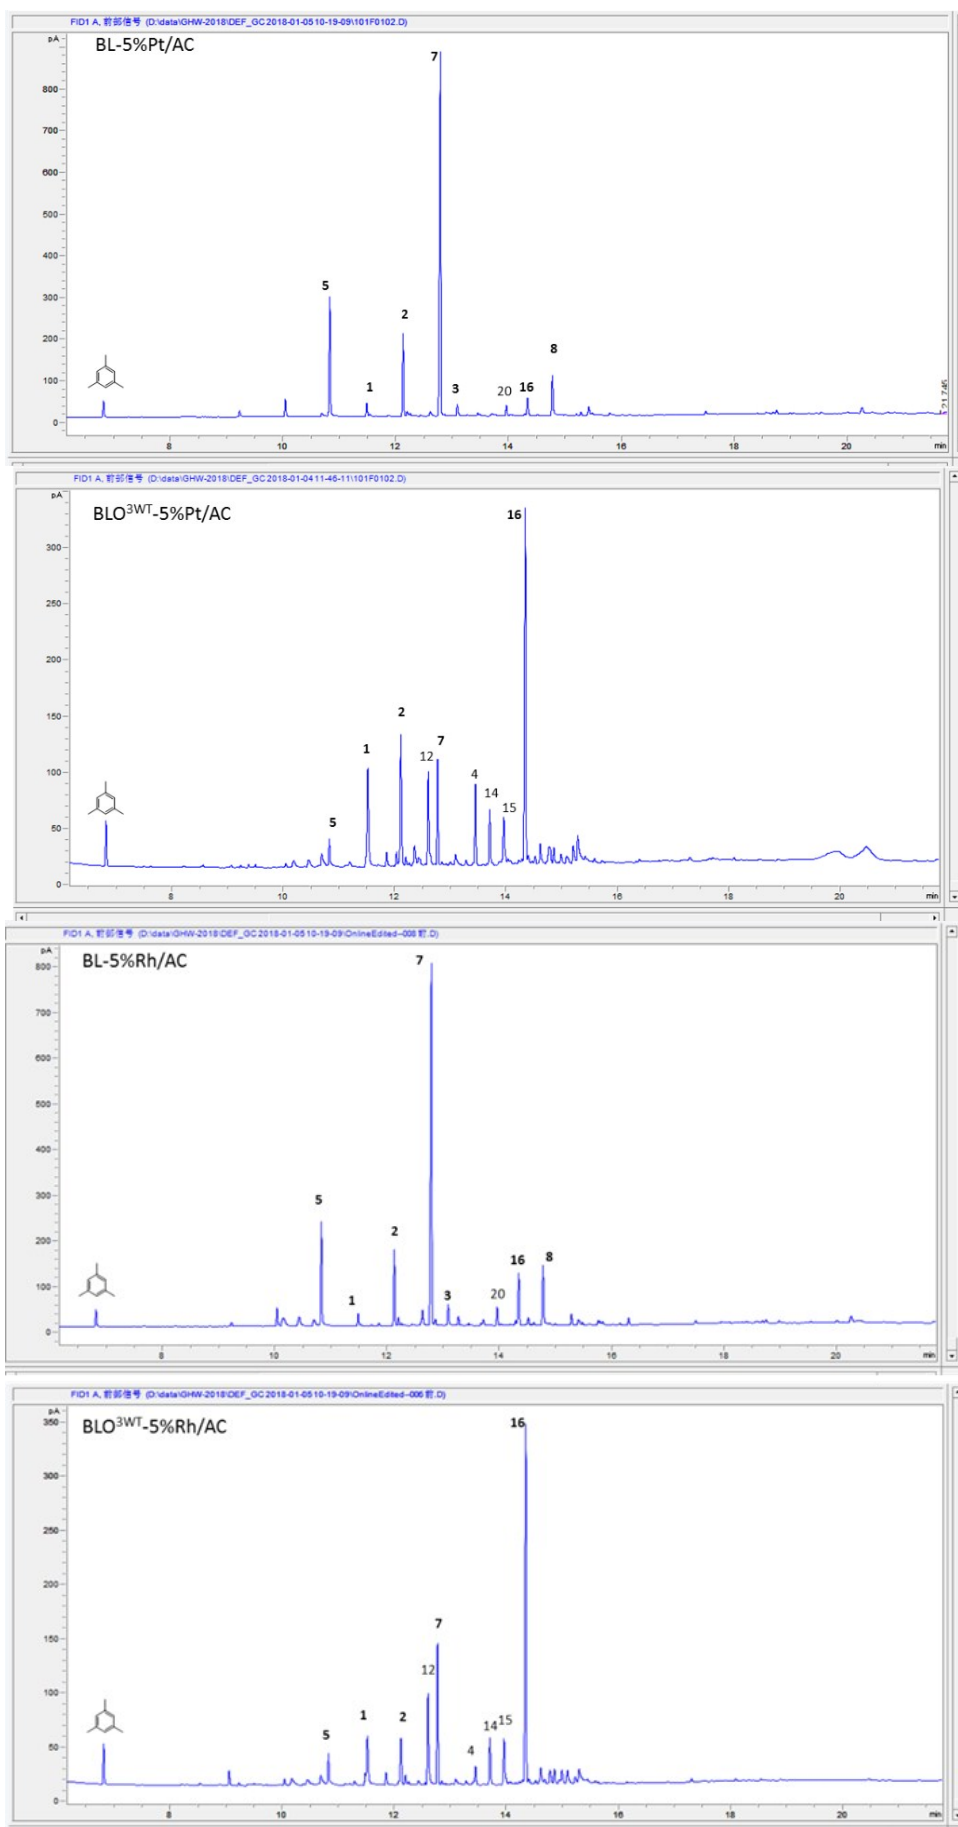

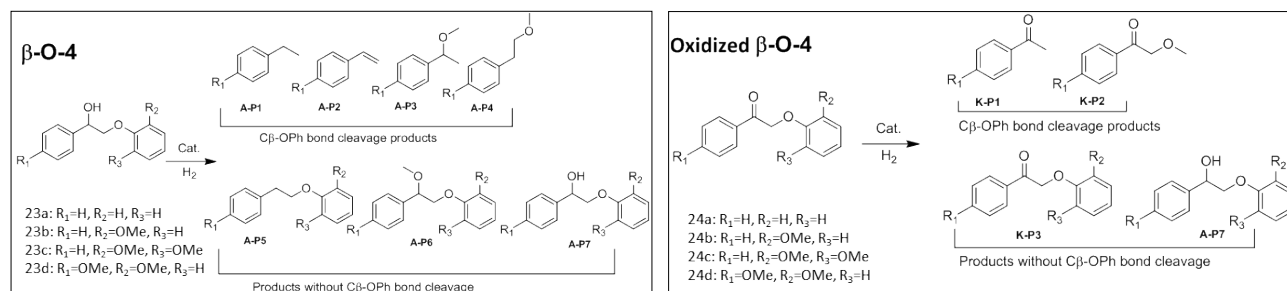

| Linkage type                           | Sub. | Conversion % | Yield (%) of C-O cleavage products |      |      |      |       | Yield (%) of products without C-O cleavage |      |      |       |
|----------------------------------------|------|--------------|------------------------------------|------|------|------|-------|--------------------------------------------|------|------|-------|
|                                        |      |              | A-P1                               | A-P2 | A-P3 | A-P4 | Total | A-P5                                       | A-P6 | A-P7 | Total |
| <b><math>\beta</math>-O-4</b>          | 23a  | 42           | 0                                  | 6    | 0    | 0    | 6     | 6                                          | 0    | 58   | 64    |
|                                        | 23b  | 100          | 9                                  | 36   | 17   | 5    | 67    | 4                                          | 4    | 0    | 8     |
|                                        | 23c  | 100          | 6                                  | 37   | 20   | 4    | 67    | 0                                          | 4    | 0    | 4     |
|                                        | 23d  | 95           | 14                                 | 7    | 7    | 20   | 48    | 0                                          | 0    | 5    | 5     |
| <b>Oxidized <math>\beta</math>-O-4</b> |      |              | K-P1                               | K-P2 |      |      | Total | K-P3                                       | A-P7 |      | Total |
|                                        | 24a  | 61           | 32                                 | 4    |      |      | 36    | 39                                         | 9    |      | 48    |
|                                        | 24b  | 100          | 95                                 | 5    |      |      | 100   | 0                                          | 0    |      | 0     |
|                                        | 24c  | 100          | 99                                 | 5    |      |      | 100   | 0                                          | 0    |      | 0     |
|                                        | 24d  | 100          | 88                                 | 0    |      |      | 88    | 0                                          | 6    |      | 6     |

**Chart S2.** Hydrogenolysis activity comparison of i)  $\beta$ -O-4 model compounds and ii) Oxidized  $\beta$ -O-4 over  $W_2C/AC$ .

Notes: reaction conditions: substrate: 100 mg, 30%  $W_2C/AC$ : 100 mg, methanol: 30 mL, 220 °C, 2 h, 1 MPa  $H_2$  (R.T.)

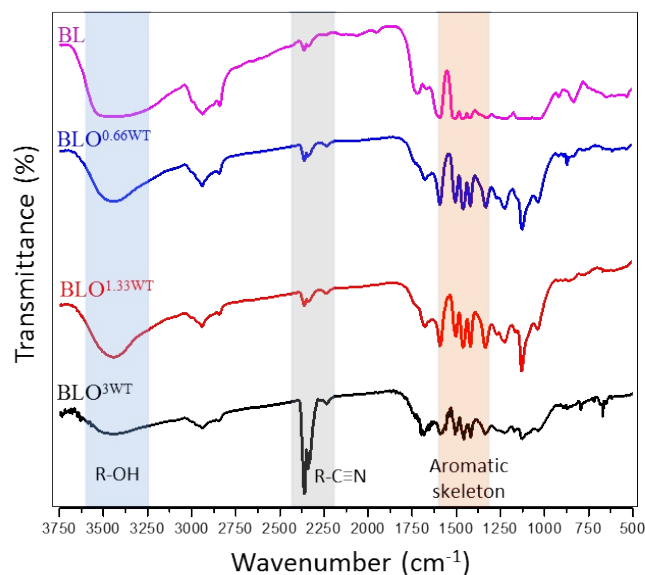

**Figure S2.** Full FT-IR spectra of BL and BLOs.

As shown in **Figure S2**, all the samples exhibited similar aromatic skeleton ( $\sim 1500\text{ cm}^{-1}$ , light orange) as the proof of lignin structure.<sup>1</sup> R-OH ( $\sim 3500\text{ cm}^{-1}$ , light blue) was also observed in both BLOs and BL as the existence of both aliphatic alcohol and phenolic alcohol. Moreover,  $R-C\equiv N$  ( $\sim 2275\text{ cm}^{-1}$ , light grey) was detected in all lignin samples, and  $BLO^{3WT}$  showed stronger intensity of  $R-C\equiv N$  as the existence of DDQ residue, which agreed with the elemental analysis where  $BLO^{3WT}$  contained 2.83% of **N** comparing to 0.03%, 1.05% and 1.72% of **N** in BL,  $BLO^{0.66WT}$  and  $BLO^{1.33WT}$  separately (**Table S4**).

Table S4. Elemental analysis results of various lignin and the corresponding forms of lignin<sup>α-ox</sup>.

| Lignin<br>Elements | BL    | BLO <sup>0.66wt</sup> | BLO <sup>1.33wt</sup> | BLO <sup>3wt</sup> |
|--------------------|-------|-----------------------|-----------------------|--------------------|
| C [%]              | 73.15 | 56.73                 | 55.03                 | 54.16              |
| H [%]              | 6.76  | 4.69                  | 4.24                  | 3.73               |
| O [%]              | 20.06 | 37.54                 | 39.01                 | 39.28              |
| N [%]              | 0.03  | 1.05                  | 1.72                  | 2.83               |
| S [%]              | 0.00  | 0.00                  | 0.00                  | 0.00               |
| C/H                | 10.82 | 12.11                 | 12.97                 | 14.54              |

To examine the elemental components of BL and, elemental analysis was undertaken. From Table S4, we observed notable decrease of **C** in BLOs, arranging from 54.16% to 56.73 in BLOs, comparing with 73.15% in BL. Similar trend was observed in the percentage of **H**, in which 6.76 % was detected in BL comparing with 3.73% in BLO<sup>3WT</sup> as the dehydrogenation during oxidation procedure. In terms of C/H ratio, although not dramatic but still nonnegligible difference (10.82 for BL and 14.54 for BLO<sup>3WT</sup>) can be seen, implying a slight change of BLOs structure. Trace **N** was detected in BL, making up 0.03% of the total components, while more (as many as 2.83 %) was observed in BLO<sup>3WT</sup> which originated from DDQ or DDQ-H<sub>2</sub> residue.<sup>12</sup> No **S** was detected in any kinds of lignin.

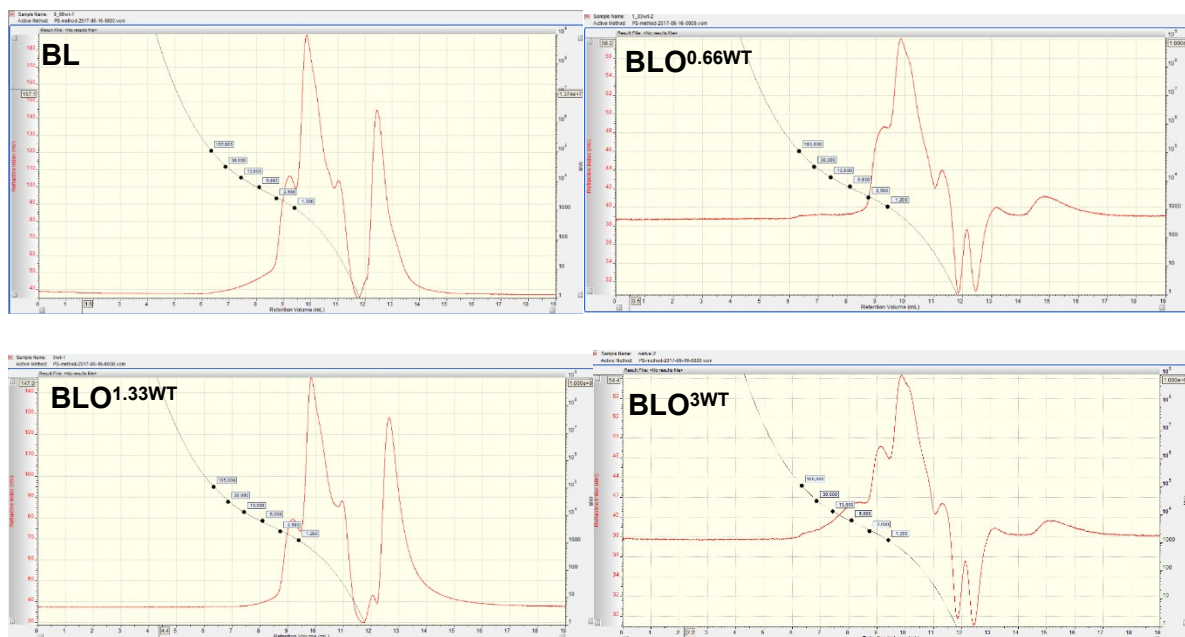

Figures S3. Weight-(Mw) and number-average (Mn) molecular weight of lignin by GPC analysis.

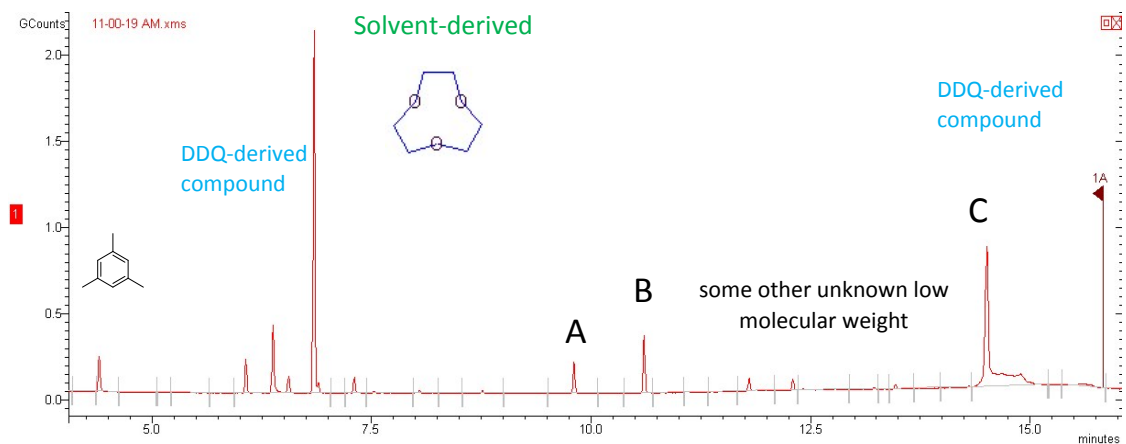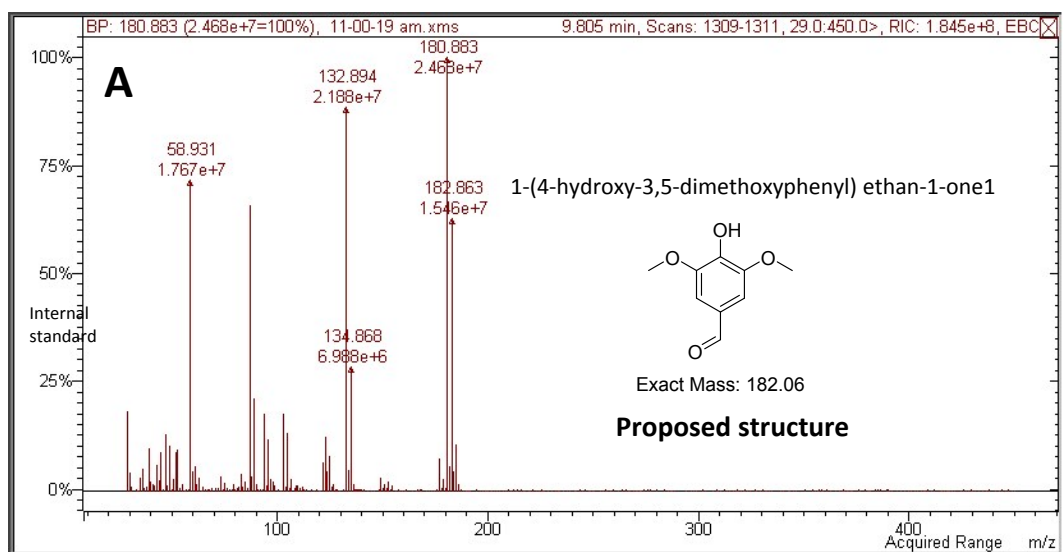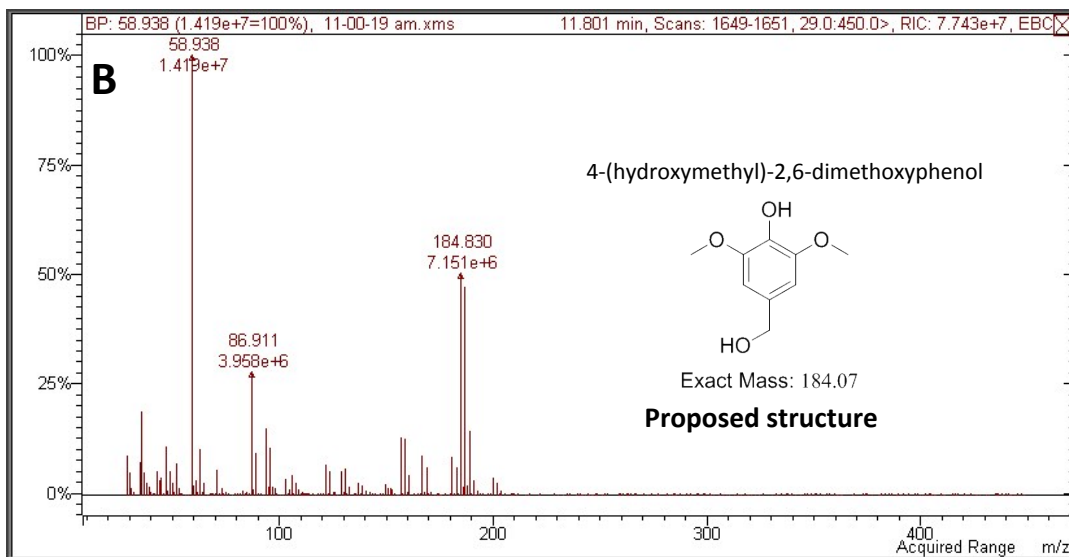

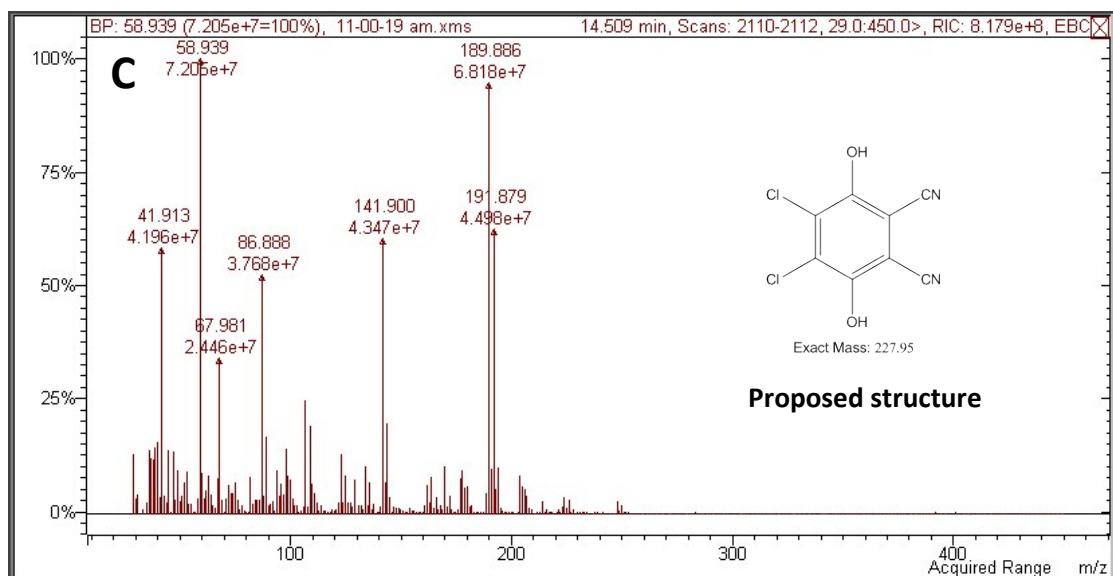

**Figure S4.** GC-MS analysis of compounds released during oxidation progress.

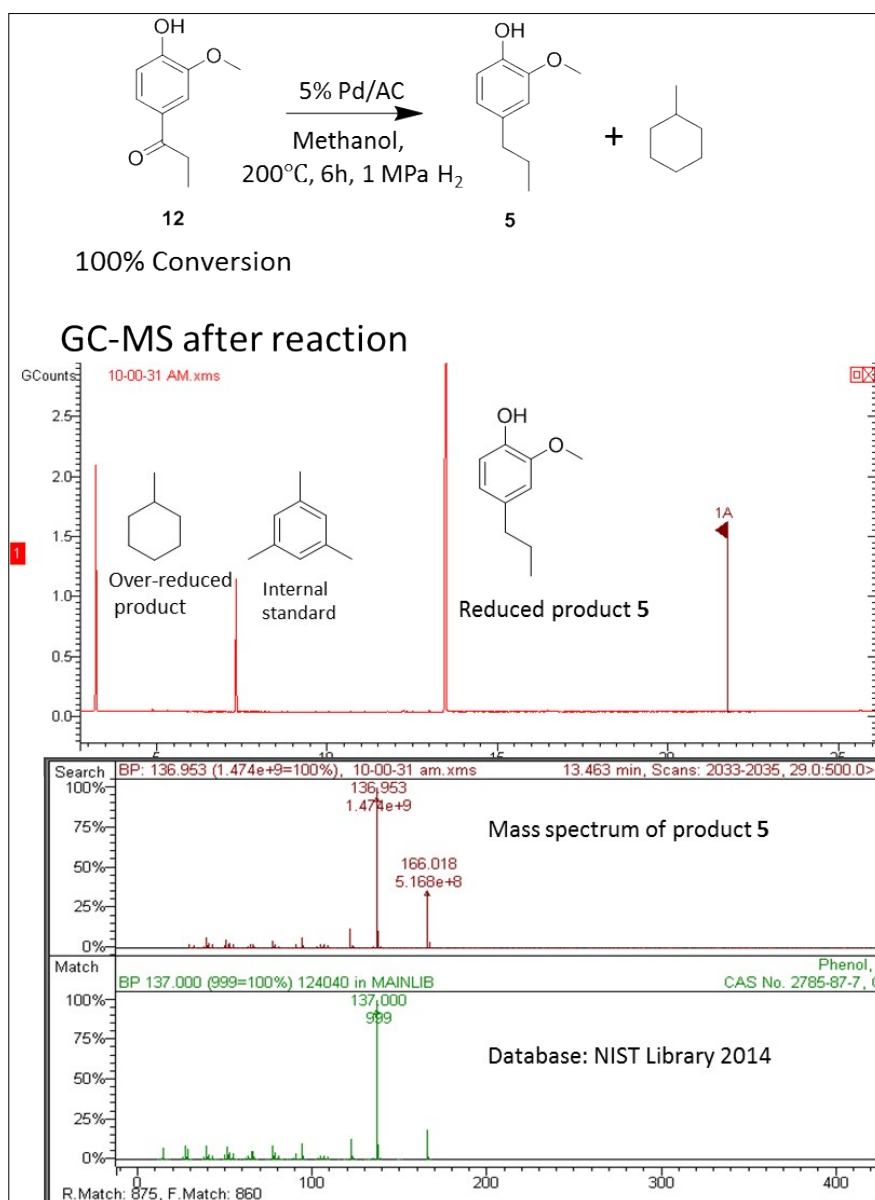

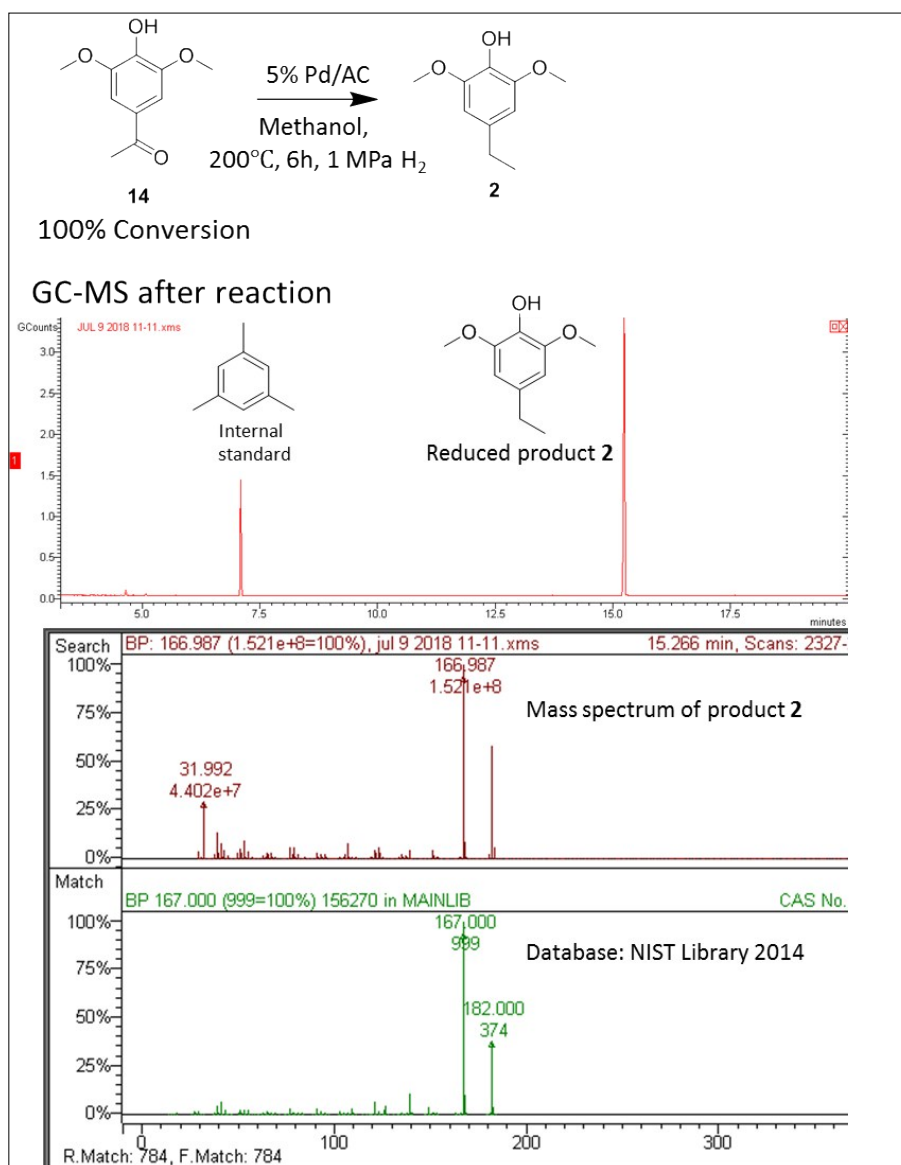

Figure S5. Proof study of the reduction of carbonyl-containing aromatic products (12 to 5 & 14 to 2) over 5% Pd/AC.

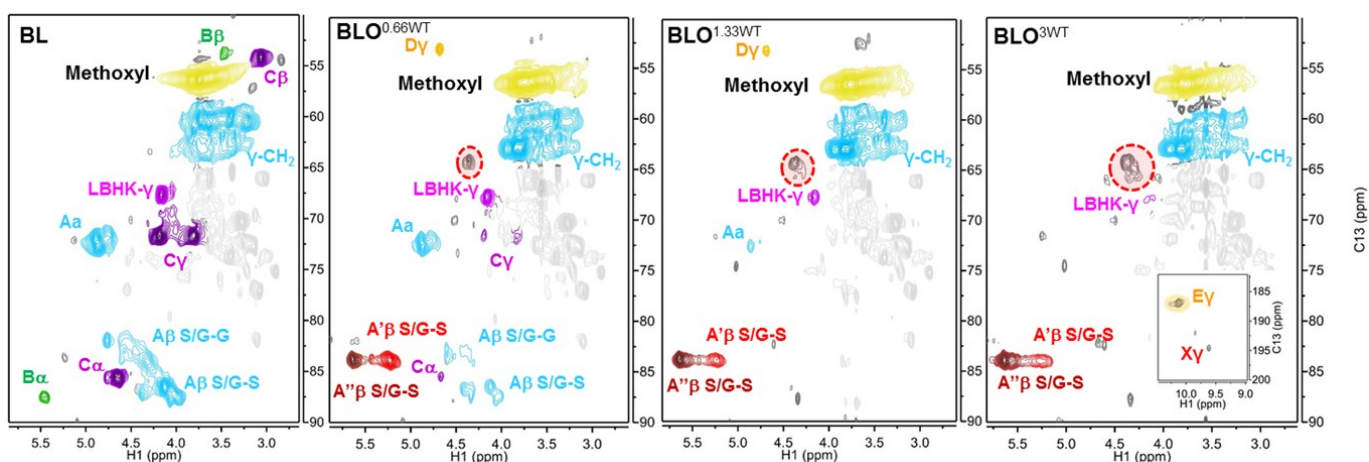

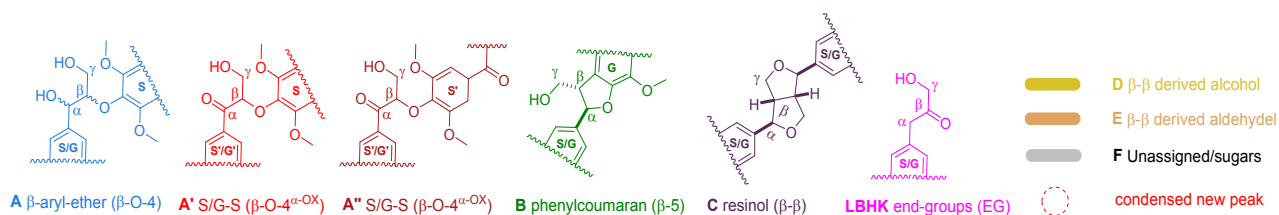

**Figure S6.** 2D HSQC NMR spectrum of BL and BLOs (prepared under different oxidative pretreatments with DDQ).<sup>2</sup>

Please note that these data are repeated 2D-HSQC-NMR spectrum in order to revisit unknown signals which were overlooked in our previous study<sup>2</sup> in Chem. Sci., 2018, 9, 702–711. Therefore, the discussion on the NMR in the present work and the previous study are totally different and the data are not the same.

## 2. References

- (a) Liu, Y.; Hu, T.; Wu, Z.; Zeng, G.; Huang, D.; Shen, Y.; He, X.; Lai, M.; He, Y., *Environ Sci Pollut Res Int* **2014**, 21 (24), 14004; (b) Liu, Q.; Wang, S.; Zheng, Y.; Luo, Z.; Cen, K., *J. Anal. Appl. Pyrol.* **2008**, 82 (1), 170; (c) Guo, H.; Zhang, B.; Qi, Z.; Li, C.; Ji, J.; Dai, T.; Wang, A.; Zhang, T., *ChemSusChem*. **2017**, 10 (3), 523; (d) Derkacheva, O.; Sukhov, D., *Macromol. Symp.* **2008**, 265 (1), 61; (e) Faix, O., *Holzforschung*.**1991**, 45 (s1), 21.
- Guo, H.; Miles-Barrett, Daniel M.; Neal, A. R.; Zhang, T.; Li, C.; Westwood, N. J., *Chem. Sci.* **2018**, 9 (3), 702.
